# Supplementary material
Source: MDPI journal article supplement (https://www.mdpi.com/2073-4344/7/9/263)
Supplement: s1 [file s1]

Supplementary Materials: Regioselective Synthesis of Lactulose Esters by *Candida antarctica* and *Thermomyces lanuginosus* Lipases

Luis Felipe Chávez-Flores, Hiram Isaac Beltran, Daniel Arrieta-Baez and Dolores Reyes-Duarte

(a)

(b)


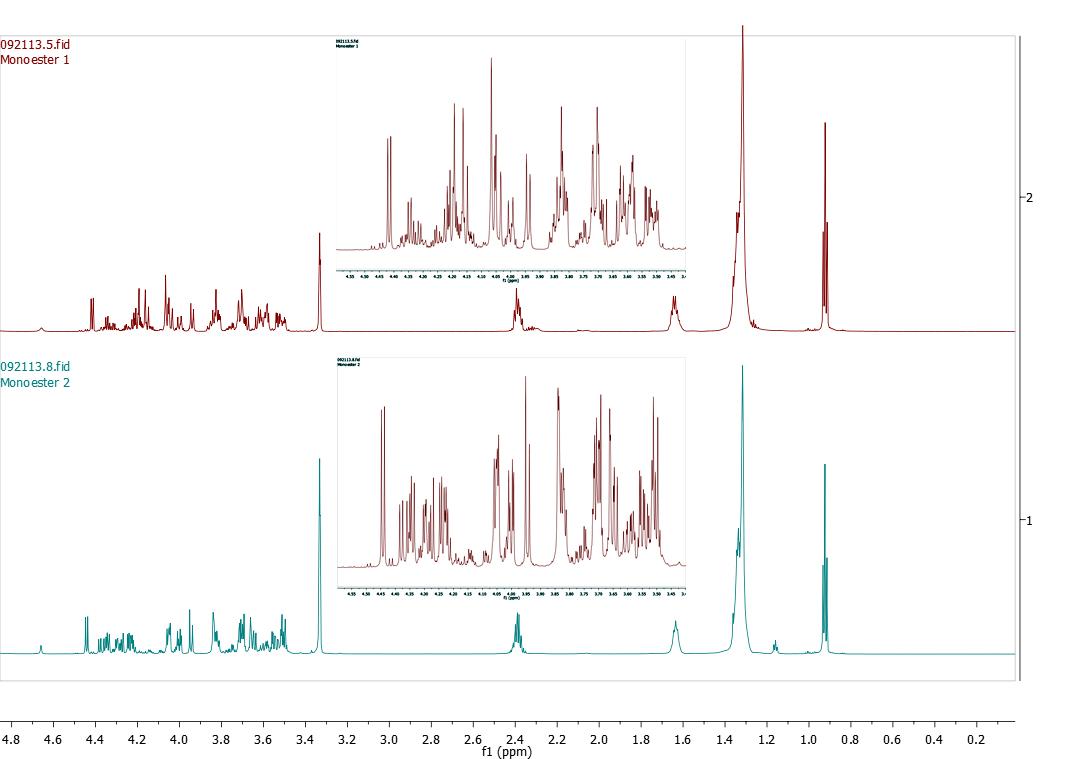


**Figure S1****.** 1H NMR spectra of purified reaction products: (**a**) Monoester fraction 1 of Novozym 435 and (**b**) Monoester fraction 2 of Lipozyme TL IM.


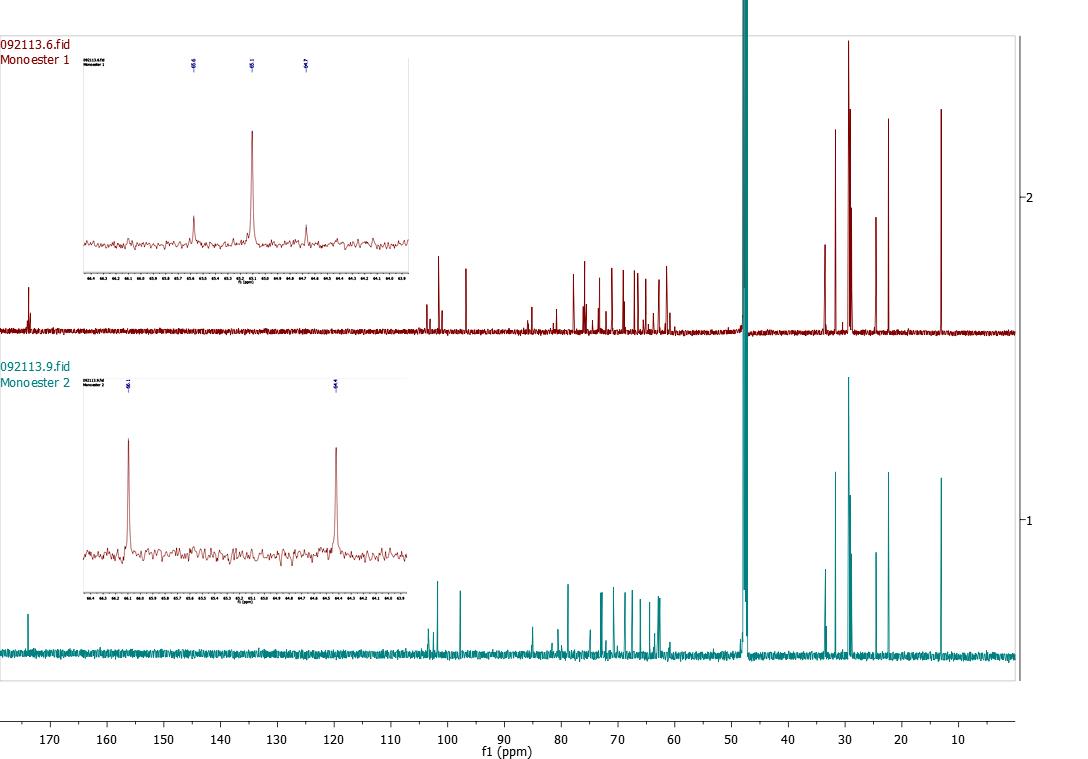


(a)

(b)

**Figure S2.** 13C NMR spectra of purified reaction products: (**a**) Monoester fraction 1 of Novozym 435 and (**b**) Monoester fraction 2 of Lipozyme TL IM.


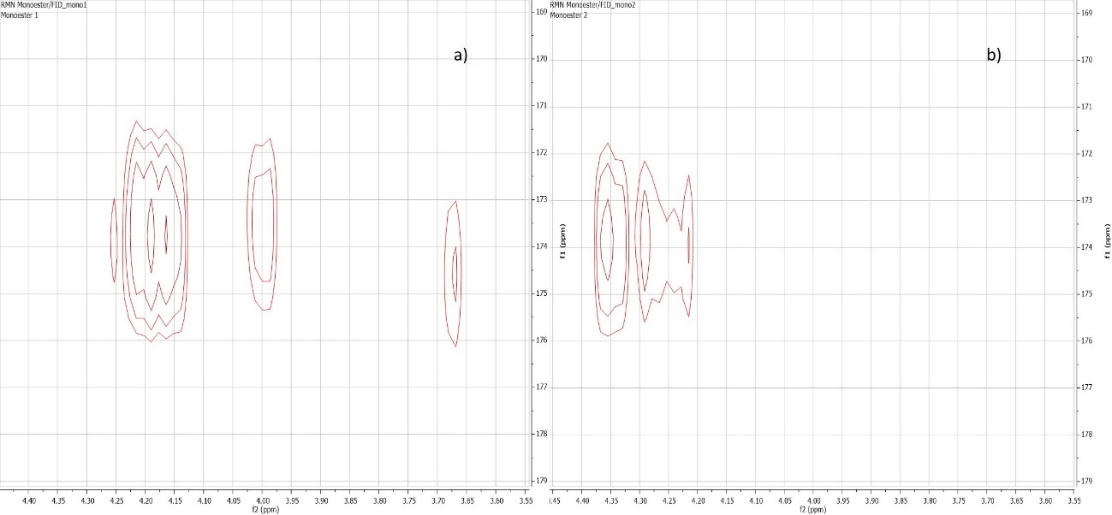


**Figure S3****.** HMBC spectra of purified reaction products. (**a**) Monoester fraction 1 of Novozym 435 and (**b**) Monoester fraction 2 of Lipozyme TL IM. X axis: 1H; Y axis: 13C


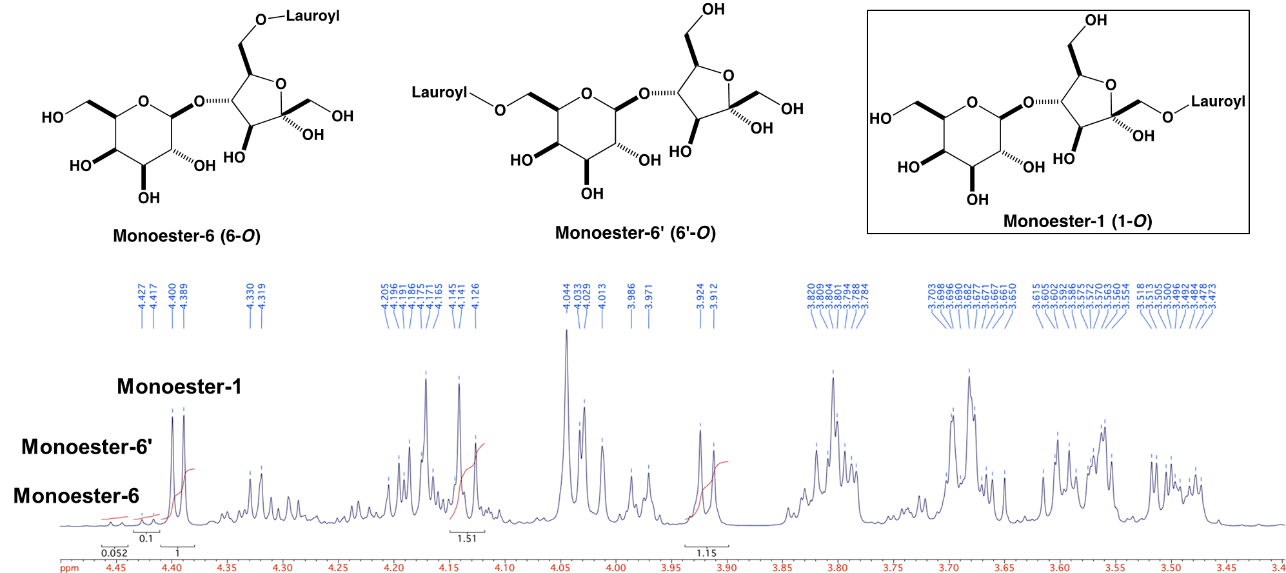


**Figure S4.** 1H NMR spectra and integration of monoesters obtained from Novozym 435.


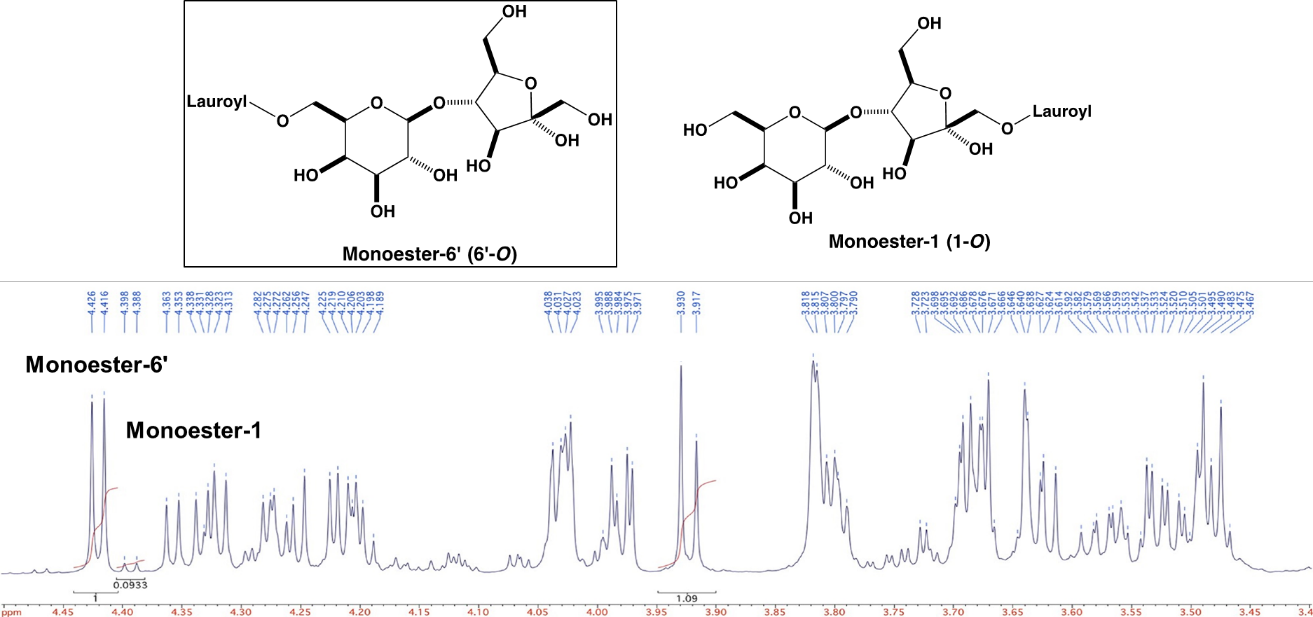


**Figure S5.** 1H NMR spectra and integration of monoesters obtained from Lipozyme TL IM.
